# Supplementary material for: Leber Hereditary Optic Neuropathy (LHON) in Patients with Presumed Childhood Monocular Amblyopia
Source: Preprints.org preprint supplement (doi:10.20944/preprints202310.0594.v1), 2023-10-10
Supplement: Supplementary file 1 [file supplementary]

|  | Patient 1 | | | | Patient 2 | | Patient 3 | | | |
| --- | --- | --- | --- | --- | --- | --- | --- | --- | --- | --- |
|  | LHON eye | | Amblyopic eye | | LHON eye | Amblyopic eye | LHON eye | | Amblyopic eye | |
|  | Acute | Chronic | Acute | Chronic | Acute | Acute | Acute | Chronic | Acute | Chronic |
| N95/P50 | 0.78 | 0.92 | 0.71 | 0.81 | 0.89 | 0.76 | 1.52 | 1.04 | 1.27 | 1.05 |
| Lat P50 | 45.0 | 48.0 | 45.0 | 47.0 | 47.0 | 47.0 | 40.00 | 47.0 | 46.0 | 45.0 |
| Amp P50 | 5.4 | 5.2 | 4.0 | 5.8 | 4.4 | 3.3 | 2.9 | 5.0 | 2.2 | 4.0 |
| Lat N95 | 106.0 | 94.0 | 100.0 | 98.0 | 106.0 | 115.0 | 103.0 | 95.0 | 111.0 | 100.0 |
| Amp N95 | 4.2 | 4.8 | 4.2 | 4.7 | 3.9 | 2.5 | 4.4 | 5.2 | 2.8 | 4.2 |
| Lat P100 | 136.0 | undetectable | 113.0 | undetectable | undetectable | undetectable | 148.0 | 110.0 | 151.0 | 113.0 |
| Amp P100 | 1.7 | 0.0 | 1.3 | 0.0 | 0.0 | 0.0 | 1.0 | 1.4 | 0.9 | 1.3 |

Table S2. Electrophysiology data for three patients on both eyes (LHON and presumably ambly-opic) in the acute (three patients) and chronic (two patients) phase of the disease
